24

## Abstract

25 *Background:* Human visual cortical area hMT+, like its homologue MT in the macaque monkey, has  
26 been shown to be particularly selective to visual motion. After damage to the primary visual cortex  
27 (V1), patients often exhibit preserved ability to detect moving stimuli, which is associated with  
28 neural activity in area hMT+. As an anatomical substrate underlying residual function in the absence  
29 of V1, promoting functional plasticity in hMT+ could potentially boost visual performance despite  
30 cortical damage.

31 *Objective:* To establish in healthy participants whether it is possible to use transcranial direct current  
32 stimulation (tDCS) over hMT+ to potentiate learning of visual motion direction discrimination.

33 *Methods:* Participants were trained daily for five days on a visual motion direction discrimination  
34 task. Task difficulty was increased as performance improved, by decreasing the proportion of  
35 coherently moving dots, such that participants were always performing at psychophysical threshold.  
36 tDCS, either anodal or sham, was applied daily during the 20-minute training session. Task  
37 performance was assessed at baseline and at the end of the training period.

38 *Results:* All participants showed improved task performance both during and after training. Contrary  
39 to our hypothesis, anodal tDCS did not further improve performance compared to sham stimulation.  
40 Bayesian statistics indicated significant evidence in favour of the null hypothesis.

41 *Conclusion:* Anodal tDCS to hMT+ does not enhance visual motion direction discrimination learning  
42 in the young healthy visual system.

43

44

45

## 46 **Introduction**

47 The principal pathway conveying visual information from the eye to the brain projects via the  
48 primary visual cortex (V1), the largest cortical visual area. The critical role of this area in vision is  
49 reflected in the fact that any damage to this region can lead to cortical blindness. However, even after  
50 damage to V1, many patients continue to show cortical brain activity in the human motion area  
51 hMT+ [1-4] and some are adept at detecting moving stimuli, a capacity known as blindsight [5].  
52 Hence area hMT+ is a potential intervention target for rehabilitation regimes that aim to improve  
53 visual function after V1 damage [6, 7].

54 In the healthy visual system, the specialised role of hMT+ in humans and MT in the non-human  
55 primate has been demonstrated using multiple techniques, including electrophysiology[8-10], lesion  
56 studies [11-13], fMRI [14] and electrical stimulation [15]. Given this role it could be hypothesized  
57 that perceptual training on motion discrimination should result in functional changes within MT.  
58 However, this does not appear to be the case, at least in the macaque. Law & Gold [16-18] have  
59 shown that learning a motion task does not change neuronal properties in MT, but rather this occurs  
60 at the level of the sensory-motor decision, in lateral intraparietal area (LIP). Nevertheless, Lui &  
61 Pack [19] demonstrated that while training on a motion discrimination task did not change the  
62 sensitivity of individual MT neurons, after training there was an increased effect of MT  
63 microstimulation on biasing motion direction decisions.

64 In humans, learning a visual motion discrimination task over 5 days causes an increase in neural  
65 activity in MST, part of the human motion complex, which correlates with the amount of learning  
66 [20], suggesting a functional role for MST in the improved performance. Since this region often  
67 remains active in patients who have suffered damage to V1, it may be that visual discrimination  
68 training could strengthen subcortical connections to visual motion areas and increase residual visual  
69 function. While boosting performance with training is beneficial, addition of an adjunct intervention  
70 to increase plasticity, such as pharmacological enhancement of acetylcholine levels [21], can further  
71 potentiate the effect.

72 Here we tested whether a different neuroplasticity intervention, non-invasive brain stimulation of  
73 hMT+, when applied during training could also increase learning. We chose to stimulate using  
74 excitatory (anodal) transcranial direct current stimulation (tDCS) and compare this to sham. Anodal

75 tDCS increases visual cortical excitability [22, 23] and has been reported to enhance visual  
76 functioning [24-27]. In the motor system, anodal tDCS applied to primary motor cortex during  
77 training has been shown to enhance acquisition and consolidation of motor learning [28, 29]. The  
78 current study tested whether anodal tDCS of hMT+ would augment learning of visual motion  
79 direction discrimination.

## 80 **Materials and Methods**

### 81 Participants

82 24 participants (13 female and 11 male; M=24.7 years; SD=5.8 years) were randomly assigned to an  
83 anodal (n=13) or sham (n=11) stimulation group. Before study completion, three participants  
84 withdrew from the study, two from the anodal group and one from the sham group. Owing to  
85 incomplete data, these participants were excluded from all analyses.

86 The study was approved by the local InterDivisional Research Ethics Committee (IDREC) at the  
87 University of Oxford (reference MSD-IDREC-C2-2014-025) and all participants gave written,  
88 informed consent. Research was carried out in accordance with the Code of Ethics of the World  
89 Medical Association (Declaration of Helsinki). All participants underwent safety screening to  
90 exclude contraindications to brain stimulation prior to each test session.

### 91 Visual task

92 Participants completed a motion perception task where the instructions were to discriminate the  
93 direction of coherently-moving dots presented amongst randomly-moving distractor dots. Moving  
94 dots (n=143) were presented within a circular area 11° in diameter, offset 10° to the left or right of  
95 fixation. Dots were high contrast white dots on a black background. The luminance and chromaticity  
96 measures (SpectraScan PR-650) were white: 96.8cd/m<sup>2</sup> (x=0.289, y=0.312), and black: 0.92cd/m<sup>2</sup>  
97 (x=0.236, y=0.247). Each trial consisted of a 500ms stimulus window, a pause for the participant  
98 response, and a 200ms feedback window (Figure 1A). The next trial began automatically following  
99 the feedback window. The response window remained on-screen until the participant responded.  
100 During all sessions participants were offered an optional screen break every 20 trials to reduce  
101 fatigue.

102 All participants completed ten training sessions of the motion discrimination task. The training  
103 sessions were completed two per day, for five consecutive days (2 training sessions of 400 trials per  
104 day, each session lasting around 10 minutes) with a break of 1-2 minutes between training sessions  
105 carried out on the same day. Learning effect was quantified from the assessment sessions on day 1  
106 and day 5, which acted as the dependent variable (400 trials per assessment, each session lasting  
107 around 20 minutes). In these assessment sessions, stimuli were presented to the left or right visual  
108 hemifield in a pseudorandomly interleaved manner, with 200 trials per hemifield. For the training  
109 sessions, the stimulus was delivered to the right visual hemifield only, to allow the left hemifield to  
110 act as a control (i.e. contrast trained > untrained hemifield).

111 Task difficulty was adaptively modulated by altering the ratio of coherently-moving dots to  
112 randomly-moving dots, using a two up one down staircase procedure[30]. New staircases were  
113 initiated for every assessment and training session. For the assessment sessions, independent  
114 staircases were applied for the two visual hemifields. Motion direction discrimination thresholds for  
115 every session were calculated by taking the mean of the coherence on each reversal trial (the task  
116 changed from increasing in difficulty to decreasing, or vice versa). The first 10 reversals were  
117 discarded. The average provided a threshold at which the participant is predicted statistically to be  
118 correct 80% of the time.

### 119 Brain stimulation

120 Participants received five sessions (20 minutes each) of tDCS delivered over left hMT+ (HDCKit,  
121 Magstim), one each day, concurrent with the 20-minute training period. For sham stimulation the  
122 current was ramped up to 1mA over 10 seconds and then switched off. For anodal stimulation, the  
123 current was ramped up over a duration of 10 seconds and remained at 1mA for 20 minutes. Direct  
124 current was delivered through electrodes inside rectangular saline-soaked sponges. The cathode  
125 (8.5cm x 6cm) was placed at the vertex and the anode (5cm x 5cm) was placed 3cm above theinion  
126 along the nasion-inion line and 6cm left of the midline in the sagittal plane (Figure 1). The latter  
127 scalp coordinates were derived from prior research with transcranial magnetic stimulation (TMS),  
128 which showed effects of stimulation at this location on visual motion processing [31, 32]. The  
129 electrode montage used here has been used in previous tDCS research to stimulate left hMT+ [26].

130 The experimenter who conducted the training and stimulation was blinded as to whether the  
131 participant was receiving sham or anodal stimulation. This was done using an automatic blinding

132 mode on the tDCS stimulation device. Unblinding was performed once data collection was  
133 completed, prior to analysis.

## 134 **Results**

135  
136 There were no reported adverse effects of the tDCS, with the exception of sensations of itching and  
137 tingling in both sham and anodal groups, with no difference between the groups.

138 Data from ten participants in a previous study (5 female, 18-29 years) using the same protocol, but  
139 without any stimulation, were included in the analysis for comparison [33]. For all assessment and  
140 training sessions, performance was quantified by determining the motion direction discrimination  
141 threshold, a measure used in previous studies to quantify changes in learning [20, 33].

142 For training sessions, thresholds were normalized within each participant relative to performance in  
143 the initial training session (i.e. Day 1). Performance levels in the daily motion perception training  
144 sessions were indistinguishable across the three groups (Figure 1B). While there was a significant  
145 effect of training session ( $F(9,252) = 16.3$ ;  $p < 0.001$ ), indicating that participants learned the task,  
146 there was no difference between the anodal, sham and no stimulation groups ( $F(2, 28) = 1.5$ ;  $p =$   
147  $0.23$ ).

148 To aid interpretation of the null effect of tDCS, a Bayesian repeated measures ANOVA was also  
149 performed, using the open-source software package JASP (<http://www.jasp-stats.org>) [34]. Bayesian  
150 analyses permit a test of the relative strength of evidence for the null hypothesis ( $H_0$ : no effect of  
151 tDCS stimulation group) versus the alternative hypothesis ( $H_1$ : change in behaviour as a result of  
152 tDCS condition) [35]. The pattern of results was consistent across both frequentist and Bayesian  
153 analyses. The main effect of training was significant, reflected in a higher Bayes factor for the  
154 alternative hypothesis ( $H_1$ : training changes behavioural performance) than the null hypothesis ( $H_0$ :  
155 no behavioural effect of training;  $BF_{10} = 1.6 \times 10^{18}$ ). The Bayes factor for the effect of tDCS  
156 stimulation condition ( $H_1$ ) was less than one ( $BF_{10} = 0.37$ ). In contrast, the reciprocal value ( $BF_{01} =$   
157  $2.7$ ) suggests that the null hypothesis (that there is no effect of tDCS condition) is 2.7 times more  
158 likely than the alternative hypothesis.

159 For assessment sessions, a learning index was calculated using the following formula:

$$\text{Learning Index} = \frac{(T_1 - T_2)}{(T_1 + T_2)}$$

160 where  $T_1$  refers to the threshold before training, and  $T_2$  refers to the threshold after training was  
161 completed.

162 There was no significant difference in the learning index between anodal, sham and no stimulation  
163 groups (Figure 1C) either for the trained hemifield (one-way ANOVA:  $F(2, 30)=1.754$ ,  $p=0.192$ ) or  
164 the untrained hemifield (one-way ANOVA:  $F(2, 30)=2.283$ ,  $p=0.121$ ). A one-way Bayesian ANOVA  
165 was also performed on the learning index, and, consistent with the previous result, provided evidence  
166 in favour of the null hypothesis ( $BF_{10} = 0.63$ ;  $BF_{01} = 1.59$ ).

167 Next we tested if anodal tDCS would enhance consolidation of visual learning across consecutive  
168 days. Offline consolidation refers to performance gains that occur after training during a rest interval.  
169 In this task, offline consolidation would be reflected in a lower direction discrimination threshold the  
170 day after training compared to the threshold achieved at the end of the previous day. Forgetting  
171 would be reflected in a threshold increase. Maintenance of learning would be reflected in no change  
172 across the interval between days. Figure 1B indicates there was no clear evidence of offline  
173 consolidation across consecutive days. A one-way ANOVA on the mean difference in performance  
174 between consecutive days indicated no effect of tDCS on consolidation ( $F(2,30) = 1.52$ ,  $p = 0.24$ ).  
175 Similarly, the Bayesian ANOVA provided evidence in favour of the null hypothesis ( $BF_{10} = 0.54$ ;  
176  $BF_{01} = 1.85$ ).

177

## 178 **Discussion**

179 All participant groups included in this study showed significant improvement in direction  
180 discrimination thresholds over the five-day training period, consistent with previous results [20, 33].  
181 Furthermore, daily anodal tDCS to hMT+ during training had no effect on learning or offline  
182 consolidation.

183 All groups showed improved thresholds, i.e. learned from training. Yet, despite using stimulation  
184 parameters closely similar to previous tDCS studies of hMT+ [36], there was no difference in  
185 performance between groups receiving anodal or sham tDCS. The improvement with training in both



186 these groups was comparable to previous data from participants that had not received stimulation  
187 (Figure 1C). There are several potential reasons for the lack of a tDCS learning or consolidation  
188 enhancement effect.

189 Firstly, hMT+ was not identified in each participant individually using fMRI, so it is possible that the  
190 anodal electrode did not effectively stimulate the target area. However, this seems unlikely. Area  
191 hMT+ has been shown to vary only by approximately 2.7cm in the left hemisphere [37] and to be, on  
192 average, 0.3cm<sup>3</sup> in size [38]. The tDCS electrode dimensions exceed this (hMT+ anode: 5cm x 5cm),  
193 so it is likely that the stimulation at least partially covered hMT+. A related point is that the  
194 stimulation is applied at the scalp, and the achieved current dose within cortex is likely to vary across  
195 participants. The location of hMT+ is also variable across individuals, and can be either on a gyrus,  
196 in the sulcus, or both [39, 40]. How variations in individual anatomy interact with induced electrical  
197 current dose is currently under active investigation [41]. Nevertheless, inter-participant variance was  
198 in a similar range for the anodal and sham groups, suggesting this is unlikely to be a key factor in the  
199 null result.

200 Secondly, only the effects of anodal stimulation on a motion direction perception task were  
201 considered in this study. It may be interesting to investigate whether cathodal stimulation of hMT+  
202 alters motion perception in this type of extended training protocol. Battaglini et al. [42] found that  
203 both anodal and cathodal stimulation improved performance on a visual motion discrimination task,  
204 although the authors suggest the improvement was due to different mechanisms. We chose to  
205 stimulate with anodal tDCS as this polarity of stimulation has most reliably been associated with  
206 learning gains, at least in the motor system.

207 A third point relates to the number of participants in the study. Variability in tDCS effects have led to  
208 calls for greatly increased sample sizes [43]. One important, relatively neglected point in this  
209 discussion is that the end goal of much neuromodulation research is therapeutic. Here our motive for  
210 investigating tDCS was to advance the long-term goal of improving visual function in individual  
211 patients. For this to be practical, tDCS effects need to be measurable reliably in small samples, such  
212 as the single-case and small group designs that reflect the real-world challenges of clinical  
213 neuropsychology research and practice [44]. A small, but statistically significant effect that requires  
214 large populations to detect is unlikely to have measurable benefit at an individual level.



215 Finally, multiple studies have shown that visual perceptual learning improves visual performance.  
216 We found no evidence that concurrent anodal tDCS to hMT+ accelerated perceptual learning or  
217 enhanced consolidation over a 5-day training period. It is possible that the training itself induced a  
218 ceiling effect in these young participants with a healthy visual system.

219 Although tDCS in these healthy participants did not improve visual motion discrimination, this does  
220 not rule out the possibility of a beneficial effect of the same intervention in a patient group. In  
221 healthy, sighted participants the main thalamocortical projection from the retina to V1 is intact. In  
222 contrast, patients with damage to the primary visual cortex must rely on other connections to convey  
223 retinal information to the visual cortex. Since these alternative connections are unlikely to be as  
224 strong as the V1 pathway, it may be that training this pathway concurrent with electrical stimulation  
225 in patients would have a measurable effect.

226

227

## 228 **Conclusion**

229 In conclusion, anodal stimulation of hMT+ in healthy participants during motion perception training  
230 did not improve performance compared to sham stimulation. This suggests that online, anodal  
231 stimulation of hMT+ (at least with the montage, current strength, duration, and participant sample  
232 tested here) may not be an effective way to modulate motion perception learning.

233

234

235 **Conflict of Interest Statement**

236 The authors declare that the research was conducted in the absence of any commercial or financial  
237 relationships that could be construed as a potential conflict of interest.

238 **Author Contributions**

239 Conception and design of the work (SL, CK, HB, JO'S), data collection (SL, JO'S), data analysis and  
240 interpretation (SL, HB), drafting the article (SL, HB, JO'S), critical revision of the article (SL, HB,  
241 JO'S), final approval of the version to be published (SL, CK, HB, JO'S).

242 **Funding**

243 This work was funded by The Royal Society through a University Research Fellowship and Medical  
244 Research Council grant (MR/K014382/1) to HB, a Clarendon Scholarship and St John's College  
245 Scholarship to SL and a John Fell award to HB and SL. SL, CK and JO'S are funded by the NIHR  
246 Oxford Biomedical Research Centre. The views expressed are those of the authors and not  
247 necessarily those of the NHS, the NIHR or the Department of Health.

248

249

250

251 **Figure Legend**

252

253 **Figure 1: A: Motion direction discrimination task.** Participants determined the direction of  
254 coherent motion of moving dots. Each trial consisted of 500ms stimulus period, followed by an  
255 untimed user response window. Following participant response, feedback was provided (red or green  
256 fixation cross) for 200ms, and then the next trial start immediately. **B: Comparison of performance**  
257 **of anodal, sham and no tDCS stimulation groups across the ten training sessions.** There was no  
258 significant difference between normalised discrimination thresholds at the final training session,  
259 indicating a similar amount of learning occurred in all three groups. **C: Comparison of learning**  
260 **index computed from the assessment on day 1 and day 5 of anodal, sham and no tDCS**  
261 **stimulation groups across trained and untrained visual hemifields.** There was no significant  
262 difference in the learning index across groups, neither in the trained nor untrained hemifields. Error  
263 bars show  $\pm$ SEM.

264

## 265 **References**

- 266 [1] Ajina S, Kennard C, Rees G, Bridge H. Motion area V5/MT+ response to global motion in the  
267 absence of V1 resembles early visual cortex. *Brain* 2015;138(Pt 1):164-78.
- 268 [2] Bridge H, Hicks SL, Xie J, Okell TW, Mannan S, Alexander I, et al. Visual activation of extra-  
269 striate cortex in the absence of V1 activation. *Neuropsychologia* 2010;48(14):4148-54.
- 270 [3] Morland AB, Le S, Carroll E, Hoffmann MB, Pambakian A. The role of spared calcarine cortex  
271 and lateral occipital cortex in the responses of human hemianopes to visual motion. *J Cogn Neurosci*  
272 2004;16(2):204-18.
- 273 [4] Zeki S, Ffytche DH. The Riddoch syndrome: insights into the neurobiology of conscious vision.  
274 *Brain* 1998;121 ( Pt 1):25-45.
- 275 [5] Cowey A. The blindsight saga. *Exp Brain Res* 2010;200(1):3-24.
- 276 [6] Ajina S, Bridge H. Blindsight and Unconscious Vision: What They Teach Us about the Human  
277 Visual System. *Neuroscientist* 2016.
- 278 [7] Das A, Huxlin KR. New approaches to visual rehabilitation for cortical blindness: outcomes and  
279 putative mechanisms. *Neuroscientist* 2010;16(4):374-87.
- 280 [8] Shadlen MN, Newsome WT. Motion perception: seeing and deciding. *Proc Natl Acad Sci U S*  
281 *A* 1996;93(2):628-33.
- 282 [9] Britten KH, Shadlen MN, Newsome WT, Movshon JA. Responses of neurons in macaque MT  
283 to stochastic motion signals. *Vis Neurosci* 1993;10(6):1157-69.
- 284 [10] Britten KH, Shadlen MN, Newsome WT, Movshon JA. The analysis of visual motion: a  
285 comparison of neuronal and psychophysical performance. *J Neurosci* 1992;12(12):4745-65.
- 286 [11] Newsome WT, Pare EB. A selective impairment of motion perception following lesions of the  
287 middle temporal visual area (MT). *J Neurosci* 1988;8(6):2201-11.
- 288 [12] Newsome WT, Wurtz RH, Dursteler MR, Mikami A. Deficits in visual motion processing  
289 following ibotenic acid lesions of the middle temporal visual area of the macaque monkey. *J*  
290 *Neurosci* 1985;5(3):825-40.
- 291 [13] Zihl J, von Cramon D, Mai N. Selective disturbance of movement vision after bilateral brain  
292 damage. *Brain* 1983;106 (Pt 2):313-40.
- 293 [14] Tootell RB, Reppas JB, Dale AM, Look RB, Sereno MI, Malach R, et al. Visual motion  
294 aftereffect in human cortical area MT revealed by functional magnetic resonance imaging. *Nature*  
295 1995;375(6527):139-41.
- 296 [15] Salzman CD, Murasugi CM, Britten KH, Newsome WT. Microstimulation in visual area MT:  
297 effects on direction discrimination performance. *J Neurosci* 1992;12(6):2331-55.
- 298 [16] Law CT, Gold JI. Neural correlates of perceptual learning in a sensory-motor, but not a sensory,  
299 cortical area. *Nat Neurosci* 2008;11(4):505-13.
- 300 [17] Law CT, Gold JI. Shared mechanisms of perceptual learning and decision making. *Top Cogn*  
301 *Sci* 2010;2(2):226-38.
- 302 [18] Law CT, Gold JI. Reinforcement learning can account for associative and perceptual learning on  
303 a visual-decision task. *Nat Neurosci* 2009;12(5):655-63.

- 304 [19] Liu LD, Pack CC. The Contribution of Area MT to Visual Motion Perception Depends on  
305 Training. *Neuron* 2017;95(2):436-46 e3.
- 306 [20] Larcombe SJ, Kennard C, Bridge H. Increase in MST activity correlates with visual motion  
307 learning: A functional MRI study of perceptual learning. *Hum Brain Mapp* 2017.
- 308 [21] Rokem A, Silver MA. Cholinergic enhancement augments magnitude and specificity of visual  
309 perceptual learning in healthy humans. *Curr Biol* 2010;20(19):1723-8.
- 310 [22] Antal A, Kincses TZ, Nitsche MA, Paulus W. Modulation of moving phosphene thresholds by  
311 transcranial direct current stimulation of V1 in human. *Neuropsychologia* 2003;41(13):1802-7.
- 312 [23] Antal A, Kincses TZ, Nitsche MA, Paulus W. Manipulation of phosphene thresholds by  
313 transcranial direct current stimulation in man. *Exp Brain Res* 2003;150(3):375-8.
- 314 [24] Kraft A, Roehmel J, Olma MC, Schmidt S, Irlbacher K, Brandt SA. Transcranial direct current  
315 stimulation affects visual perception measured by threshold perimetry. *Exp Brain Res* 2010;207(3-  
316 4):283-90.
- 317 [25] Olma MC, Kraft A, Roehmel J, Irlbacher K, Brandt SA. Excitability changes in the visual  
318 cortex quantified with signal detection analysis. *Restor Neurol Neurosci* 2011;29(6):453-61.
- 319 [26] Antal A, Nitsche MA, Kruse W, Kincses TZ, Hoffmann KP, Paulus W. Direct current  
320 stimulation over V5 enhances visuomotor coordination by improving motion perception in humans. *J*  
321 *Cogn Neurosci* 2004;16(4):521-7.
- 322 [27] Sczesny-Kaiser M, Beckhaus K, Dinse HR, Schwenkreis P, Tegenthoff M, Hoffken O.  
323 Repetitive Transcranial Direct Current Stimulation Induced Excitability Changes of Primary Visual  
324 Cortex and Visual Learning Effects-A Pilot Study. *Front Behav Neurosci* 2016;10:116.
- 325 [28] Reis J, Schambra HM, Cohen LG, Buch ER, Fritsch B, Zarahn E, et al. Noninvasive cortical  
326 stimulation enhances motor skill acquisition over multiple days through an effect on consolidation.  
327 *Proc Natl Acad Sci U S A* 2009;106(5):1590-5.
- 328 [29] O'Shea J, Revol P, Cousijn H, Near J, Petitot P, Jacquin-Courtois S, et al. Induced sensorimotor  
329 cortex plasticity remediates chronic treatment-resistant visual neglect. *Elife* 2017;6.
- 330 [30] Garcia-Perez MA. Forced-choice staircases with fixed step sizes: asymptotic and small-sample  
331 properties. *Vision Res* 1998;38(12):1861-81.
- 332 [31] Hotson JR, Anand S. The selectivity and timing of motion processing in human temporo-  
333 parieto-occipital and occipital cortex: a transcranial magnetic stimulation study. *Neuropsychologia*  
334 1999;37(2):169-79.
- 335 [32] Walsh V, Ashbridge E, Cowey A. Cortical plasticity in perceptual learning demonstrated by  
336 transcranial magnetic stimulation. *Neuropsychologia* 1998;36(4):363-7.
- 337 [33] Larcombe SJ, Kennard C, Bridge H. Time course influences transfer of visual perceptual  
338 learning across spatial location. *Vision Res* 2017;135:26-33.
- 339 [34] Wagenmakers EJ, Love J, Marsman M, Jamil T, Ly A, Verhagen J, et al. Bayesian inference for  
340 psychology. Part II: Example applications with JASP. *Psychon Bull Rev* 2018;25(1):58-76.
- 341 [35] Wagenmakers EJ, Marsman M, Jamil T, Ly A, Verhagen J, Love J, et al. Bayesian inference for  
342 psychology. Part I: Theoretical advantages and practical ramifications. *Psychon Bull Rev*  
343 2018;25(1):35-57.

- 344 [36] Antal A, Varga ET, Nitsche MA, Chadaide Z, Paulus W, Kovacs G, et al. Direct current  
345 stimulation over MT+/V5 modulates motion aftereffect in humans. *Neuroreport* 2004;15(16):2491-4.
- 346 [37] Watson JD, Myers R, Frackowiak RS, Hajnal JV, Woods RP, Mazziotta JC, et al. Area V5 of  
347 the human brain: evidence from a combined study using positron emission tomography and magnetic  
348 resonance imaging. *Cereb Cortex* 1993;3(2):79-94.
- 349 [38] Malikovic A, Amunts K, Schleicher A, Mohlberg H, Eickhoff SB, Wilms M, et al.  
350 Cytoarchitectonic analysis of the human extrastriate cortex in the region of V5/MT+: a probabilistic,  
351 stereotaxic map of area hOc5. *Cereb Cortex* 2007;17(3):562-74.
- 352 [39] Dumoulin SO, Bittar RG, Kabani NJ, Baker CL, Jr., Le Goualher G, Bruce Pike G, et al. A new  
353 anatomical landmark for reliable identification of human area V5/MT: a quantitative analysis of  
354 sulcal patterning. *Cereb Cortex* 2000;10(5):454-63.
- 355 [40] Large I, Bridge H, Ahmed B, Clare S, Kolasinski J, Lam WW, et al. Individual Differences in  
356 the Alignment of Structural and Functional Markers of the V5/MT Complex in Primates. *Cereb*  
357 *Cortex* 2016;26(10):3928-44.
- 358 [41] Datta A, Truong D, Minhas P, Parra LC, Bikson M. Inter-Individual Variation during  
359 Transcranial Direct Current Stimulation and Normalization of Dose Using MRI-Derived  
360 Computational Models. *Front Psychiatry* 2012;3:91.
- 361 [42] Battaglini L, Noventa S, Casco C. Anodal and cathodal electrical stimulation over V5 improves  
362 motion perception by signal enhancement and noise reduction. *Brain Stimul* 2017;10(4):773-9.
- 363 [43] Minarik T, Berger B, Althaus L, Bader V, Biebl B, Brotzeller F, et al. The Importance of  
364 Sample Size for Reproducibility of tDCS Effects. *Front Hum Neurosci* 2016;10:453.
- 365 [44] Tikhonov A, Haarmeier T, Thier P, Braun C, Lutzenberger W. Neuromagnetic activity in  
366 medial parietooccipital cortex reflects the perception of visual motion during eye movements.  
367 *Neuroimage* 2004;21(2):593-600.

368



**A**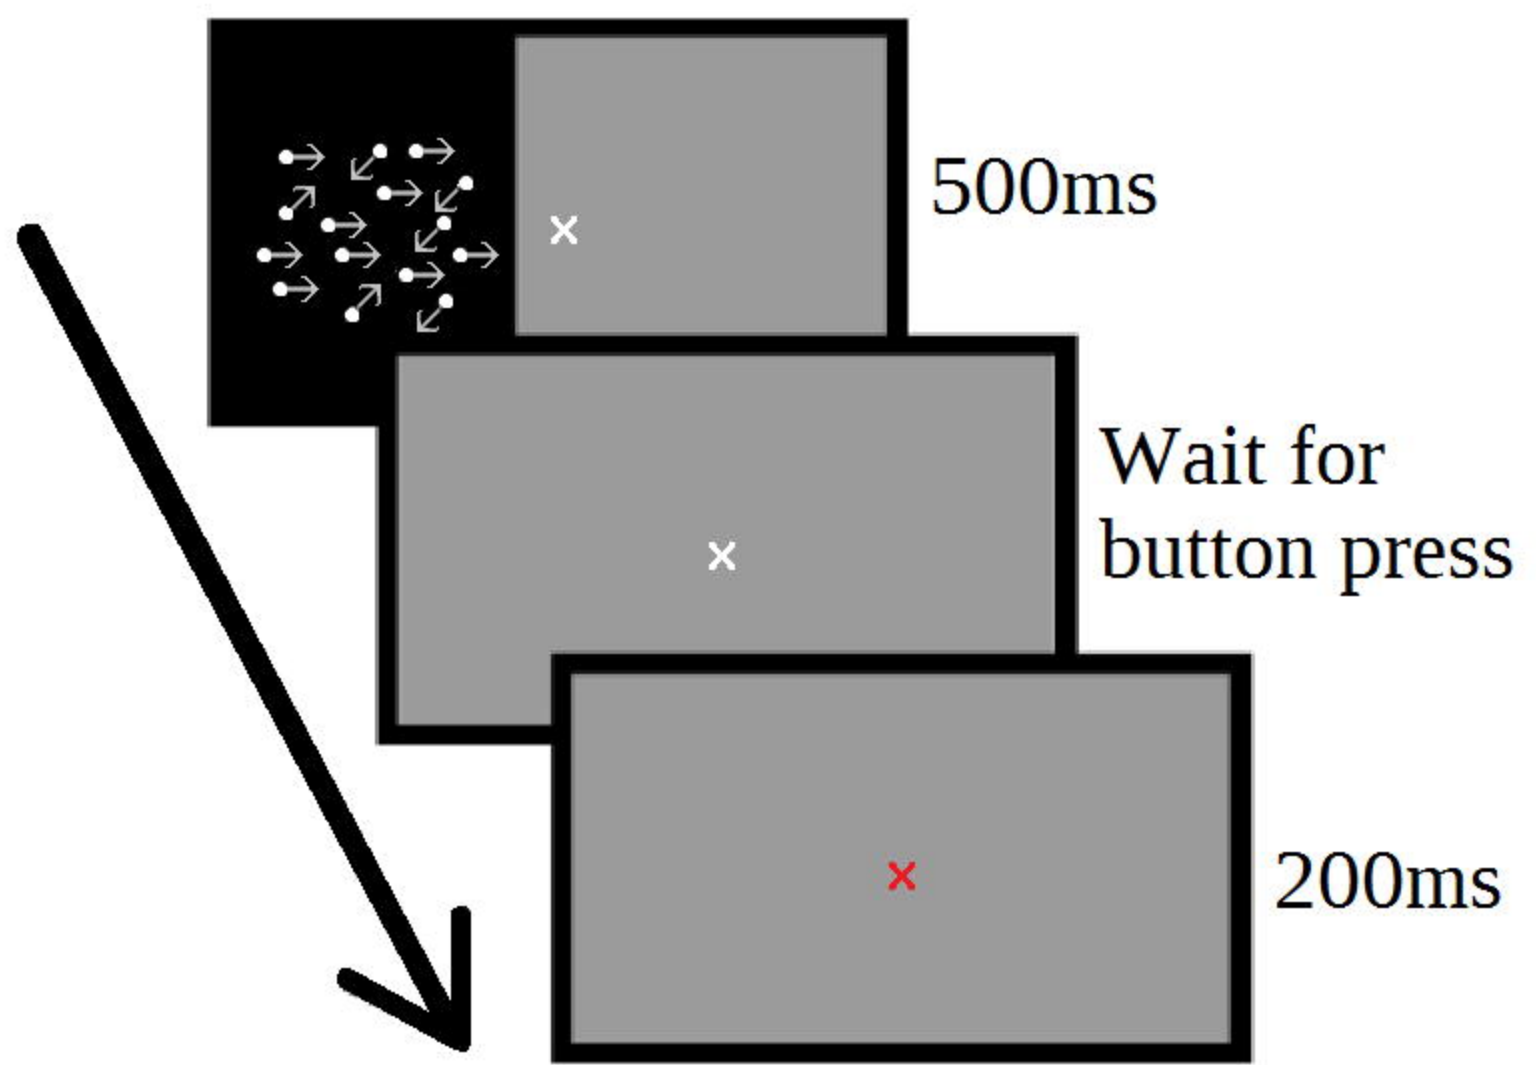**B**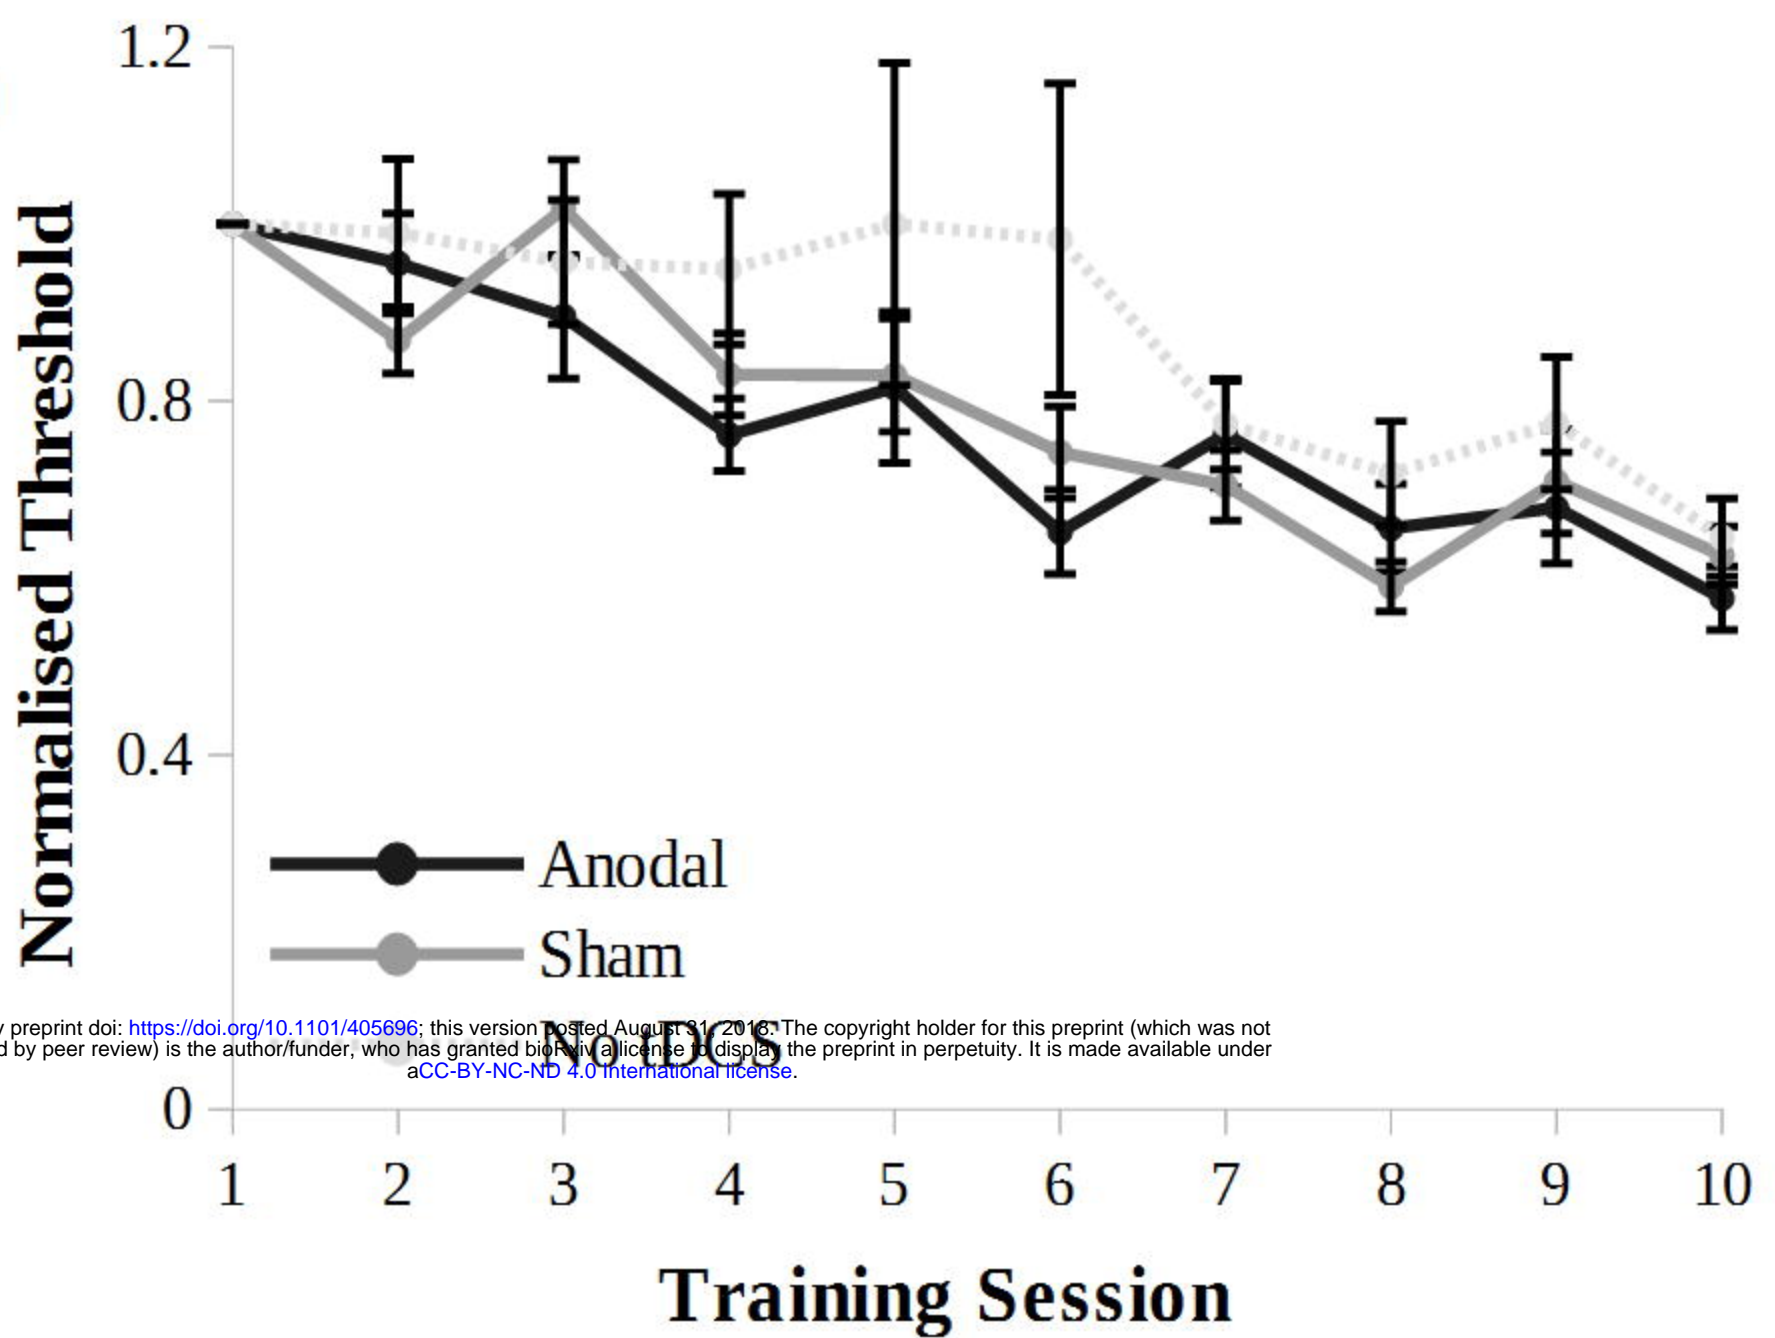

bioRxiv preprint doi: <https://doi.org/10.1101/405696>; this version posted August 31, 2018. The copyright holder for this preprint (which was not certified by peer review) is the author/funder, who has granted bioRxiv a license to display the preprint in perpetuity. It is made available under aCC-BY-NC-ND 4.0 International license.

**C**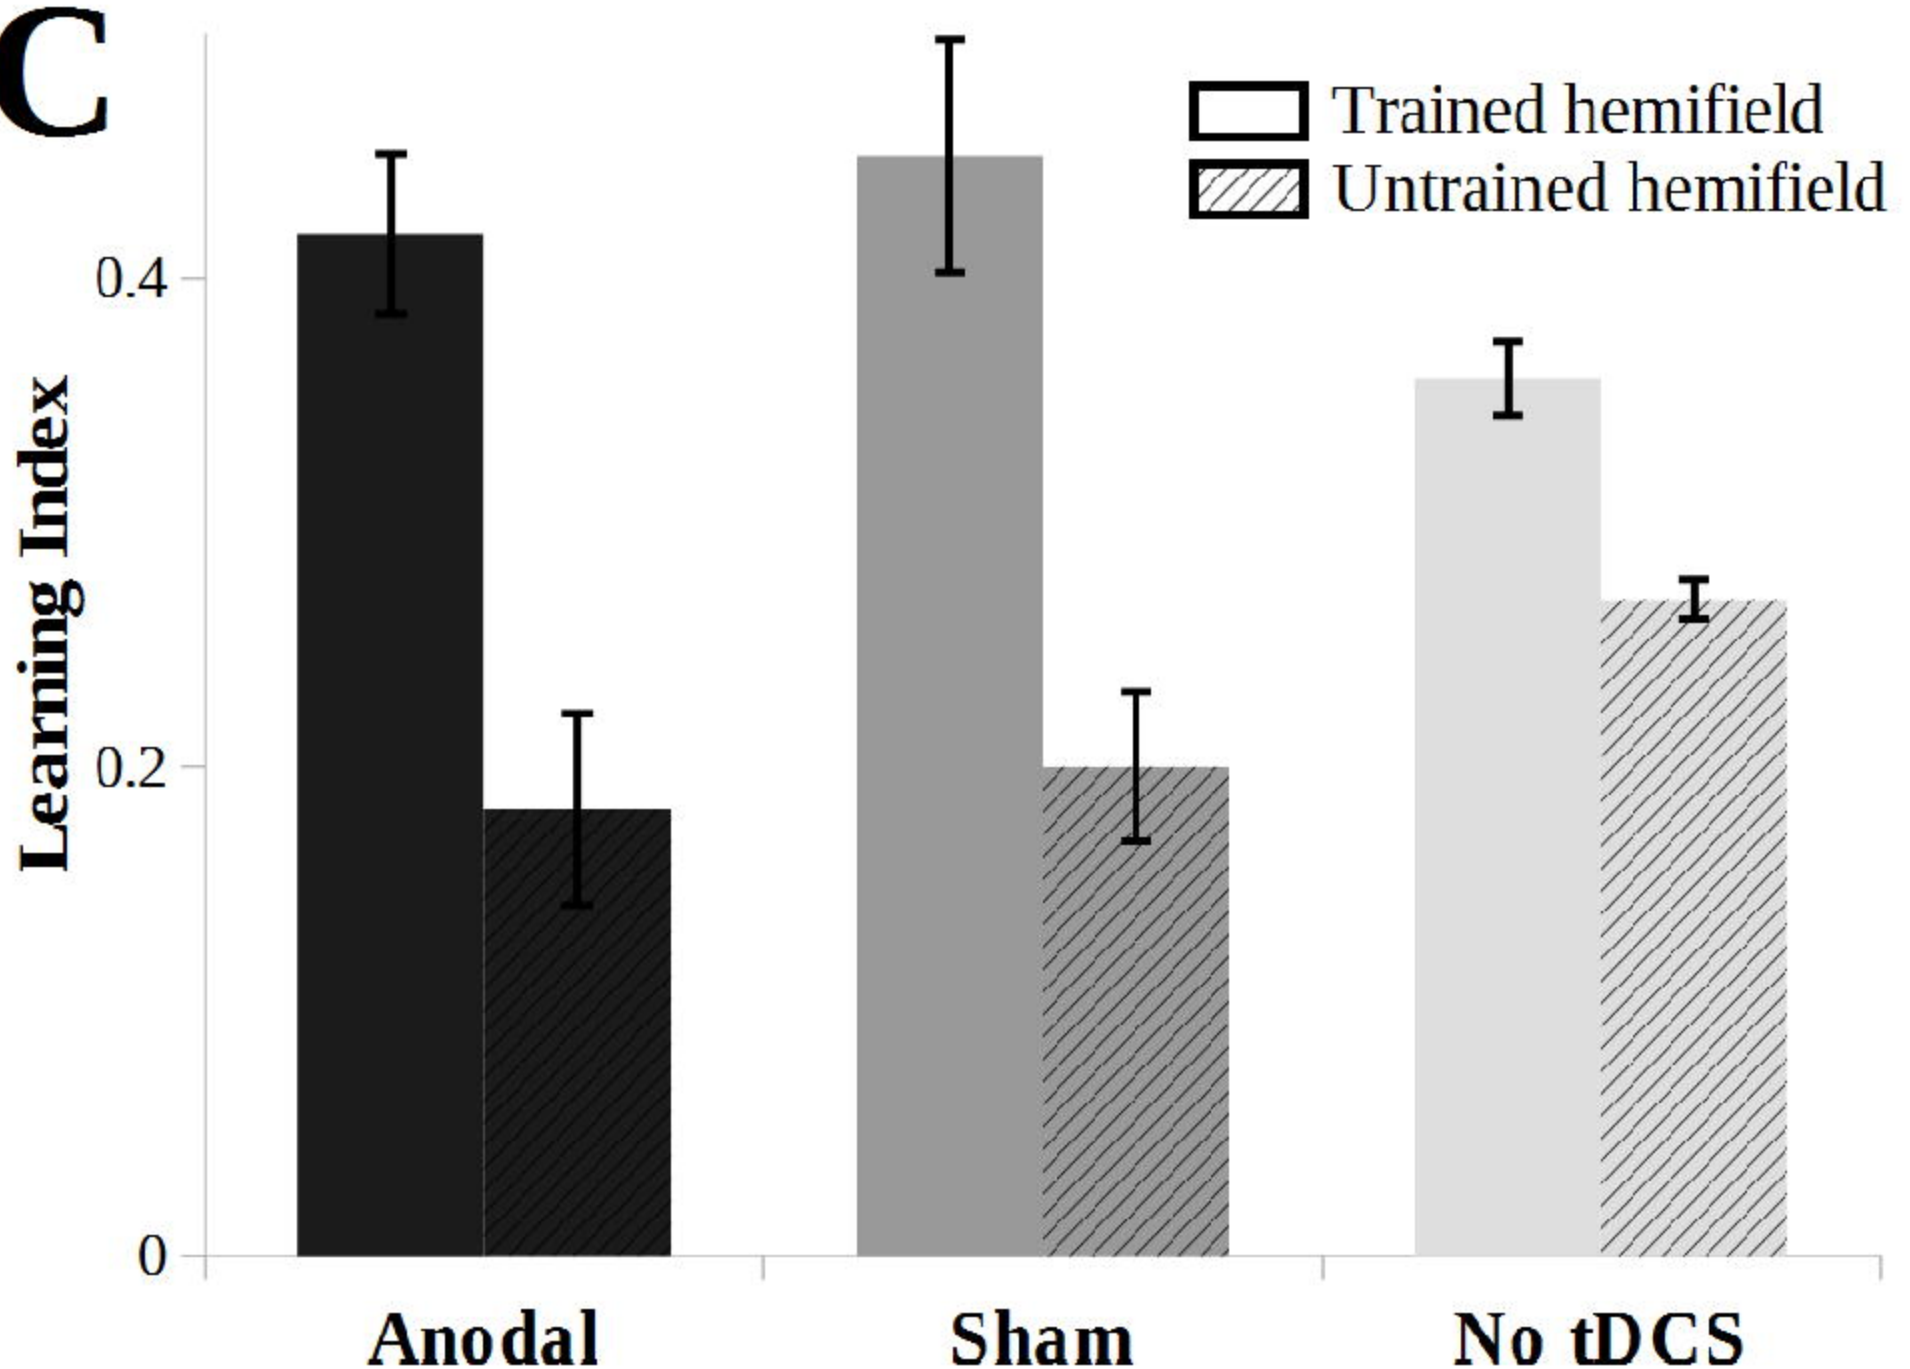

Source: http://biorxiv.org/content/10.1101/405696v1.full.pdf
